# Supplementary material
Source: PubMed Central journal article supplement (PMC4042678)
Supplement: NIHMS580554-supplement-supplement_1.pdf [file NIHMS580554-supplement-supplement_1.pdf]

|                                     |                   |        |
|-------------------------------------|-------------------|--------|
| Other histology                     | 1.79 (1.28, 2.52) | 0.001  |
| Stage                               |                   |        |
| Stage 0                             | Reference         |        |
| Stage 1A                            | 2.56 (2.19, 5.51) | <0.001 |
| Stage 1B                            | 3.47 (2.19, 5.51) | <0.001 |
| Year of diagnosis                   | 0.95 (0.91, 0.99) | 0.026  |
| Radiation                           | 3.04 (1.03, 1.06) | 0.003  |
| SEER Region                         |                   |        |
| Northeast                           | 2.00 (1.26, 3.17) | 0.003  |
| Midwest                             | Reference         |        |
| West                                | 2.63 (1.66, 4.16) | <0.001 |
| South                               | 1.98 (1.31, 3.01) | 0.001  |
| <hr/>                               |                   |        |
| <u>Model 2: EC Stage T0 and T1a</u> |                   |        |
| EET vs. Surgery                     | 1.18 (0.78, 1.80) | 0.437  |
| Age at diagnosis                    | 1.04 (1.02, 1.06) | <0.001 |
| Histology                           |                   |        |
| Adenocarcinoma                      | Reference         |        |
| Squamous cell histology             | 1.71 (1.15, 2.54) | 0.008  |
| Other histology                     | 1.74 (1.06, 2.86) | 0.028  |
| Stage                               |                   |        |
| Stage 0                             | Reference         |        |
| Stage 1A                            | 2.49 (1.56, 3.99) | <0.001 |
| Year of diagnosis                   | 0.94 (0.88, 0.99) | 0.032  |
| Radiation                           | 4.45 (3.12, 6.35) | <0.001 |
| SEER Region                         |                   |        |
| Northeast                           | 2.39 (1.21, 4.72) | 0.012  |
| Midwest                             | 2.60 (1.30, 5.20) |        |
| West                                | Reference         | 0.007  |
| South                               | 2.09 (1.11, 3.93) | 0.022  |

**Supplementary Table 1: Endoscopic eradication therapy modalities and surgical resection techniques utilized for early esophageal cancer**

| <b>Endoscopic eradication therapy (n=430)</b> | <b>Number (%)</b> |
|-----------------------------------------------|-------------------|
| Endoscopic mucosal resection (EMR) alone      | 295 (69)          |
| EMR plus photodynamic therapy (PDT)           | 23 (5)            |
| EMR plus ablation                             | 45 (10)           |
| PDT alone                                     | 42 (10)           |
| Ablation alone <sup>1</sup>                   | 21 (5)            |
| Ablative therapy, not otherwise specified     | 4 (1)             |

| <b>Surgical resection technique (n=1586)</b>    | <b>Number (%)</b> |
|-------------------------------------------------|-------------------|
| Partial esophagectomy                           | 294 (19)          |
| Total esophagectomy, not otherwise specified    | 125 (8)           |
| Esophagectomy, not otherwise specified          | 60 (4)            |
| Esophagectomy plus partial/total gastrectomy    | 988 (62)          |
| Esophagectomy plus laryngectomy +/- gastrectomy | 119 (7)           |

<sup>1</sup> Ablation – electrocautery, cryosurgery, laser

**Supplementary Table 2: Time-trend evaluation of endoscopic eradication therapies and esophagectomy in early esophageal cancer (overall) and based on stage.**

| <b>Treatment</b>  | <b>1998-2000<br/>(n,%)</b> | <b>2001-2003<br/>(n,%)</b> | <b>2004-2006<br/>(n,%)</b> | <b>2007-2009<br/>(n,%)</b> | <b><i>P</i> for trend</b> |
|-------------------|----------------------------|----------------------------|----------------------------|----------------------------|---------------------------|
| <b>EC overall</b> |                            |                            |                            |                            |                           |
| EET               | 37 (12.9)                  | 71 (14.5)                  | 136 (21.5)                 | 186 (30.8)                 | <0.001                    |
| Surgery           | 251 (87.2)                 | 420 (85.5)                 | 497 (78.5)                 | 418 (69.2)                 |                           |
| <b>Stage 0</b>    |                            |                            |                            |                            |                           |
| EET               | 16 (29.6)                  | 35 (31.3)                  | 41 (34.8)                  | 50 (68.5)                  | <0.001                    |

|                 |            |            |            |            |        |
|-----------------|------------|------------|------------|------------|--------|
| Surgery         | 38 (70.4)  | 77 (68.8)  | 77 (65.3)  | 23 (31.5)  |        |
| <b>Stage 1A</b> |            |            |            |            |        |
| EET             | 15 (11.8)  | 28 (14.9)  | 80 (27.6)  | 109 (33.0) | <0.001 |
| Surgery         | 112 (88.2) | 160 (85.1) | 210 (72.4) | 221 (67.0) |        |
| <b>Stage 1B</b> |            |            |            |            |        |
| EET             | 6 (5.6)    | 8 (4.2)    | 15 (6.7)   | 27 (13.4)  | 0.004  |
| Surgery         | 101 (94.4) | 183 (95.8) | 210 (93.3) | 174 (86.6) |        |
